# Supplementary material for: Selective Constraint on Noncoding Regions of Hominid Genomes
Source: PLOS journal article supplement (doi:10.1371/journal.pcbi.0010073), 2005-12-12
Supplement: S1 (10.1371/journal.pcbi.0010073.s001) [file journal.pcbi.0010073.sg001.pdf › journal.pcbi.0010073.sg001.pdf]

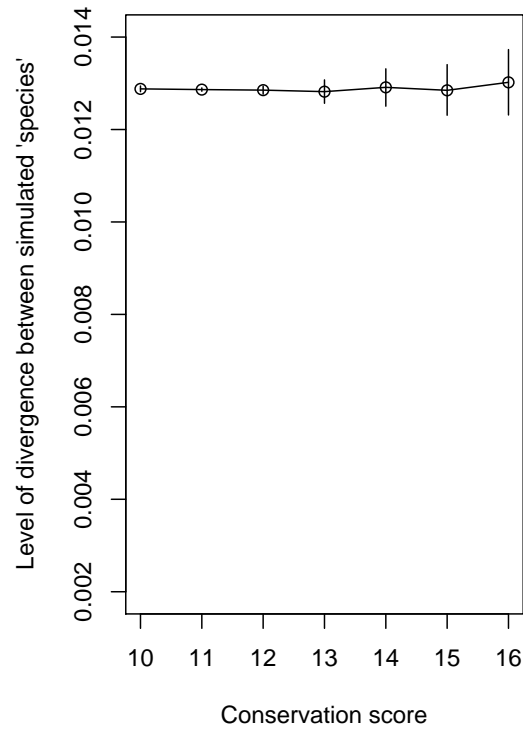

Supplementary Figure S1: Results of a simulation illustrating our method applied to truly random substitutions. Unlike the plots in fig. 1, this plot is flat, ie divergence values next to windows with a 16 score are not different from those next to windows with 10 scores. This shows that our method is not biased. (see Methods for details of the simulation).
