# Supplementary material for: Selective Constraint on Noncoding Regions of Hominid Genomes
Source: PLOS journal article supplement (doi:10.1371/journal.pcbi.0010073), 2005-12-12
Supplement: S1 (10.1371/journal.pcbi.0010073.s001) [file journal.pcbi.0010073.st001.pdf › journal.pcbi.0010073.st001.pdf]

| Conservation score | Same       | Different | Proportion different |
|--------------------|------------|-----------|----------------------|
| 10                 | 12,692,801 | 156,349   | 0.01217              |
| 11                 | 30,226,313 | 356,888   | 0.01167              |
| 12                 | 5,862,525  | 66,291    | 0.01118              |
| 13                 | 765,091    | 7,606     | 0.00984              |
| 14                 | 310,972    | 2,501     | 0.00798              |
| 15                 | 176,402    | 1,175     | 0.00662              |
| 16                 | 124,102    | 629       | 0.00504              |

Supplementary Table S1: Human-chimpanzee differences relative to mammalian conservation. Counts for the number of same and different nucleotides in the human-chimpanzee alignment for different conservation window scores. Here conservation scores were calculated using human-mouse-dog three way comparisons. Also given is the proportion different (level of divergence).
