# Supplementary material for: Selective Constraint on Noncoding Regions of Hominid Genomes
Source: PLOS journal article supplement (doi:10.1371/journal.pcbi.0010073), 2005-12-12
Supplement: S2 (10.1371/journal.pcbi.0010073.s002) [file journal.pcbi.0010073.st002.pdf › journal.pcbi.0010073.st002.pdf]

| Conservation score | Same       | Different | Proportion different |
|--------------------|------------|-----------|----------------------|
| 10                 | 6,603,542  | 80,453    | 0.01204              |
| 11                 | 21,146,072 | 245,351   | 0.01147              |
| 12                 | 3,101,449  | 34,562    | 0.01102              |
| 13                 | 130,654    | 1,233     | 0.00935              |
| 14                 | 18,167     | 107       | 0.00586              |
| 15                 | 10,180     | 38        | 0.00372              |
| 16                 | 7,950      | 21        | 0.00263              |

Supplementary Table S 2: Human-chimpanzee differences relative to amniote conservation. Counts for the number of same and different nucleotides in the human-chimpanzee alignment for different conservation window scores. Here conservation scores were calculated using human-mouse-chicken three way comparisons. Also given is the proportion different (level of divergence).
