# Supplementary material for: Selective Constraint on Noncoding Regions of Hominid Genomes
Source: PLOS journal article supplement (doi:10.1371/journal.pcbi.0010073), 2005-12-12
Supplement: S3 (10.1371/journal.pcbi.0010073.s003) [file journal.pcbi.0010073.st003.pdf › journal.pcbi.0010073.st003.pdf]

| Conservation score | Same       | Different | Proportion different |
|--------------------|------------|-----------|----------------------|
| 10                 | 12,216,333 | 109,898   | 0.00892              |
| 11                 | 29,420,851 | 262,900   | 0.00886              |
| 12                 | 5,705,704  | 49,918    | 0.00867              |
| 13                 | 736,850    | 5,624     | 0.00757              |
| 14                 | 295,262    | 1,766     | 0.00595              |
| 15                 | 166,086    | 783       | 0.00469              |
| 16                 | 116,420    | 441       | 0.00377              |

Supplementary Table S3: Non-CpG version of Supplementary Table S1. Human-chimpanzee differences relative to mammalian conservation. Counts for the number of same and different nucleotides in the human-chimpanzee alignment for different conservation window scores. Here conservation scores were calculated using human-mouse-dog three way comparisons. Also given is the proportion different (level of divergence).
