# Supplementary material for: Selective Constraint on Noncoding Regions of Hominid Genomes
Source: PLOS journal article supplement (doi:10.1371/journal.pcbi.0010073), 2005-12-12
Supplement: S4 (10.1371/journal.pcbi.0010073.s004) [file journal.pcbi.0010073.st004.pdf › journal.pcbi.0010073.st004.pdf]

| Conservation score | Same       | Different | Proportion different |
|--------------------|------------|-----------|----------------------|
| 10                 | 13,394,127 | 2,224,853 | 0.1424               |
| 11                 | 24,538,779 | 3,942,005 | 0.1384               |
| 12                 | 4,600,929  | 686,663   | 0.1299               |
| 13                 | 656,521    | 74,499    | 0.1019               |
| 14                 | 283,908    | 21,564    | 0.0706               |
| 15                 | 168,516    | 7,986     | 0.0452               |
| 16                 | 123,092    | 3,351     | 0.0265               |

Supplementary Table S4: Mouse-rat differences relative to mammalian conservation. Counts for the number of same and different nucleotides in the mouse-rat alignment for different conservation window scores. Here conservation scores were calculated using human-mouse-dog three way comparisons. Also given is the proportion different (level of divergence).
