# Supplementary material for: Selective Constraint on Noncoding Regions of Hominid Genomes
Source: PLOS journal article supplement (doi:10.1371/journal.pcbi.0010073), 2005-12-12
Supplement: S5 (10.1371/journal.pcbi.0010073.s005) [file journal.pcbi.0010073.st005.pdf › journal.pcbi.0010073.st005.pdf]

| Conservation score | Same       | Different | Proportion different |
|--------------------|------------|-----------|----------------------|
| 10                 | 6,915,434  | 1130797   | 0.1405               |
| 11                 | 17,238,886 | 2738356   | 0.1371               |
| 12                 | 2,396,752  | 355080    | 0.1290               |
| 13                 | 110,496    | 11684     | 0.0956               |
| 14                 | 17,234     | 721       | 0.0402               |
| 15                 | 10,153     | 252       | 0.0242               |
| 16                 | 7,909      | 130       | 0.0162               |

Supplementary Table S 5: Mouse-rat differences relative to amniote conservation. Counts for the number of same and different nucleotides in the mouse-rat alignment for different conservation window scores. Here conservation scores were calculated using human-mouse-chicken three way comparisons. Also given is the proportion different (level of divergence).
