# Supplementary material for: Selective Constraint on Noncoding Regions of Hominid Genomes
Source: PLOS journal article supplement (doi:10.1371/journal.pcbi.0010073), 2005-12-12
Supplement: S6 (10.1371/journal.pcbi.0010073.s006) [file journal.pcbi.0010073.st006.pdf › journal.pcbi.0010073.st006.pdf]

|                                           | # Sites hs-pt same | # Sites hs-pt Diff | Divergence |
|-------------------------------------------|--------------------|--------------------|------------|
| Mouse or dog does not align               | 2,441,719          | 30,461             | 0.0123     |
| Mouse and dog do align and are different  | 1,322,715          | 13,937             | 0.0104     |
| Mouse and dog do align and are same       | 2,547,302          | 19,336             | 0.0075     |
| Mouse,dog and chicken align, and are same | 172,857            | 970                | 0.0056     |

Supplementary Table S6: Non-CpG version of Table 1. Human-chimpanzee divergence relative to mouse, dog and chicken alignments. Alignments are whole genome alignments to 1kb of upstream human sequence. Counts consider all non-gap positions where the nucleotide was not ambiguous. Here we also eliminated all sites which overlapped with a CG in either human or chimpanzee.
