# Supplementary material for: Selective Constraint on Noncoding Regions of Hominid Genomes
Source: PLOS journal article supplement (doi:10.1371/journal.pcbi.0010073), 2005-12-12
Supplement: S8 (10.1371/journal.pcbi.0010073.s008) [file journal.pcbi.0010073.st008.pdf › journal.pcbi.0010073.st008.pdf]

| Conservation score | Count      |
|--------------------|------------|
| 10                 | 14,365,868 |
| 11                 | 39,423,942 |
| 12                 | 1,579,723  |
| 13                 | 17,133     |
| 14                 | 129        |
| 15                 | 0          |
| 16                 | 0          |

Supplementary Table S8: MTT scores based on random sequence. We generated sets of three random 10 kb sequences and calculated MTT scores from these. The counts given here come from 5,547 iterations of this. With our parameters (window size = 16 bp, sequence length = 10kb) high window scores are very unlikely by random chance.
