# Supplementary material for: Selective Constraint on Noncoding Regions of Hominid Genomes
Source: PLOS journal article supplement (doi:10.1371/journal.pcbi.0010073), 2005-12-12
Supplement: S9 (10.1371/journal.pcbi.0010073.s009) [file journal.pcbi.0010073.st009.pdf › journal.pcbi.0010073.st009.pdf]

| Conservation score | Count      |
|--------------------|------------|
| 10                 | 19,954,761 |
| 11                 | 28,421,170 |
| 12                 | 2,326,741  |
| 13                 | 46,229     |
| 14                 | 742        |
| 15                 | 2          |
| 16                 | 0          |

Supplementary Table S9: MTT scores from 10kb of upstream human noncoding sequence when compared against NON-ORTHOLOGOUS 10kb upstream sequences from mouse and dog. Data come from 5,547 sets, just as in supplementary table 1. There are very few high scoring windows here. This shows that the high scoring windows in supplementary table 1 are the result of matches between conserved orthologous sequences.
